# Supplementary material for: Lithium chloride molten flux approach to Li2MnO3:LiMO2(M = Mn, Ni, Co) “composite” synthesis for lithium-ion battery cathode applications
Source: Royal Society of Chemistry journal article supplement (doi:10.1039/c3ra47344a), 2014-01-01
Supplement: c3ra47344a1.pdf [file c3ra47344a1.pdf]

| Cycles | Process   | Samples (Averages Capacities / mAhg <sup>-1</sup> ) |                        |                        |                        |                        |                         |                        |
|--------|-----------|-----------------------------------------------------|------------------------|------------------------|------------------------|------------------------|-------------------------|------------------------|
|        |           | No LCMF<br>LiCl                                     | 48 h/800 °C<br>in LCMF | 12 h/800 °C<br>in LCMF | 72 h/800 °C<br>in LCMF | 48 h/600 °C<br>in LCMF | 48 h/1000<br>°C in LCMF | 6 h/1000 °C<br>in LCMF |
| 1      | Charge    | 111.0 ± 0.4                                         | 295 ± 3                | 248 ± 5                | 288 ± 2                | 121 ± 2                | 169 ± 2                 | 294 ± 1                |
|        | Discharge | 96.0 ± 0.4                                          | 222 ± 3                | 173 ± 3                | 211 ± 2                | 107 ± 1                | 108 ± 1                 | 218 ± 1                |
| 2      | Charge    | 103.0 ± 0.7                                         | 228 ± 3                | 191 ± 3                | 219 ± 2                | 121 ± 1                | 129 ± 2                 | 224 ± 1                |
|        | Discharge | 99.0 ± 0.7                                          | 226 ± 3                | 183 ± 3                | 216 ± 2                | 115 ± 1                | 119 ± 2                 | 218 ± 2                |
| 3      | Charge    | 104.0 ± 0.9                                         | 231 ± 3                | 190 ± 3                | 222 ± 2                | 126 ± 1                | 131 ± 2                 | 221 ± 2                |
|        | Discharge | 101.0 ± 0.8                                         | 230 ± 2                | 188 ± 3                | 220 ± 2                | 121 ± 1                | 124 ± 2                 | 221 ± 1                |
| 4      | Charge    | 104.0 ± 0.8                                         | 231 ± 2                | 194 ± 3                | 222 ± 2                | 132 ± 2                | 132 ± 1                 | 223 ± 1                |
|        | Discharge | 102.0 ± 0.9                                         | 226 ± 2                | 194 ± 3                | 216 ± 3                | 128 ± 2                | 128 ± 2                 | 217 ± 1                |
| 5      | Charge    | 106.0 ± 0.8                                         | 228 ± 2                | 196 ± 2                | 218 ± 3                | 139 ± 3                | 135 ± 1                 | 218 ± 1                |
|        | Discharge | 104.0 ± 0.9                                         | 229 ± 2                | 190 ± 2                | 221 ± 3                | 134 ± 4                | 132 ± 1                 | 217 ± 1                |

**Table 1.** Charge and discharge cycles for C/5 information for different conditions. All the conditions except 48 h/1000 °C were tested with 4 coin cells. 48 h/1000 °C was tested with 3 coin cells. All coin cells were AlPO<sub>4</sub> coated.

Table 1 presents all the conditions tested for the LCMF treatment. Among them 48 h/800 °C and 6 h/1000 °C exhibits the best specific capacity. 72 h/800 °C have less specific capacity than 48 h/800 °C. All the others have specific capacities under 200 mAhg<sup>-1</sup>.
